# Supplementary material for: B12 数学教育における比喩の意義とその展望 : 演算の指導を中心に(分科会B)
Source: Hindawi journal article supplement (doi:10.1155/2020/1754134), 1986-11-22
Supplement: f1 [file 1754134.f1.pdf]

## **Supplementary materials**

**Manuscript title: Effects of Four Kinds of Oxide Nanoparticles on Protein in EPS of Sludge**

### **Complete List of Authors:**

Weiyun Wang\*; College of Energy and Environment, Shenyang Aerospace University, Shenyang 110136, China; Key Laboratory of Clean Energy, Liaoning Province, 110136, China.

Ying Zang; College of Energy and Environment, Shenyang Aerospace University, Shenyang 110136, China; Key Laboratory of Clean Energy, Liaoning Province, 110136, China.

Cijia Wang; College of Energy and Environment, Shenyang Aerospace University, Shenyang 110136, China; Key Laboratory of Clean Energy, Liaoning Province, 110136, China.

Kangni Wang; College of Energy and Environment, Shenyang Aerospace University, Shenyang 110136, China; Key Laboratory of Clean Energy, Liaoning Province, 110136, China.

Rundong Li; College of Energy and Environment, Shenyang Aerospace University, Shenyang 110136, China; Key Laboratory of Clean Energy, Liaoning Province, 110136, China.

Correspondent Author: Weiyun Wang;

E-mail: cathywwy@sau.edu.cn

Address: No.37 Daoyi South Avenue, Shenbei New Area, Shenyang, China 110136

## Part S1 Characterization of NPs: SEM image and EDS spectrum of nanoparticles

(a) SEM image of Al<sub>2</sub>O<sub>3</sub> nanoparticles (NPs)

(b) EDS spectrum of Al<sub>2</sub>O<sub>3</sub> nanoparticles (NPs)

(c) SEM image of Fe<sub>3</sub>O<sub>4</sub> NPs

(d) EDS spectrum of Fe<sub>3</sub>O<sub>4</sub> NPs

(e) SEM image of ZnO NPs

(f) EDS spectrum of ZnO NPs

(g) SEM image of TiO<sub>2</sub> NPs

(h) EDS spectrum of TiO<sub>2</sub> NPs

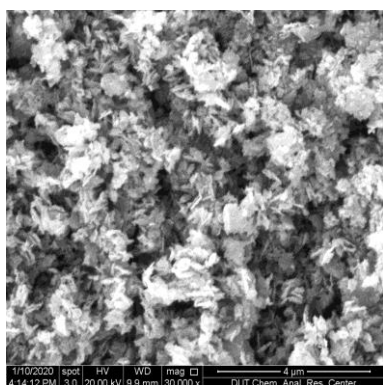

(a)

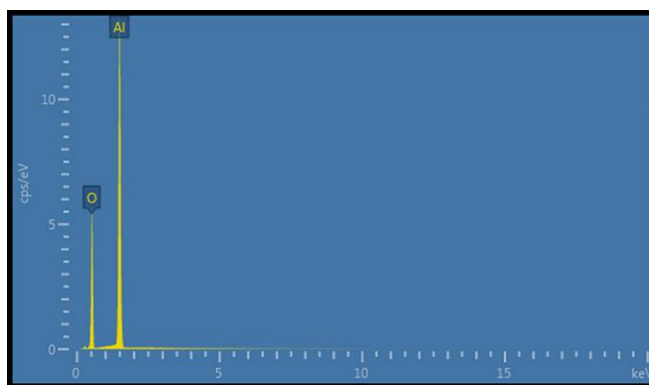

(b)

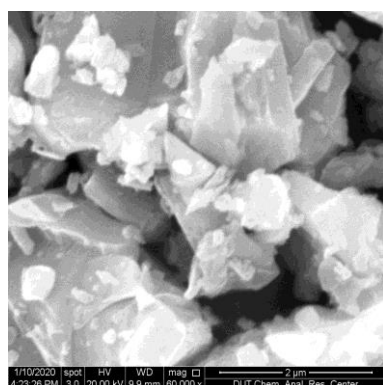

(c)

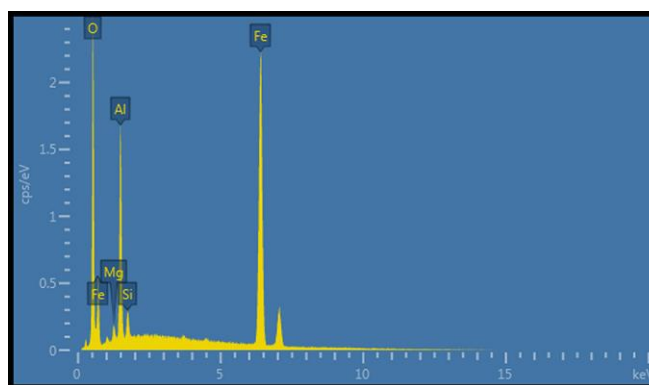

(d)

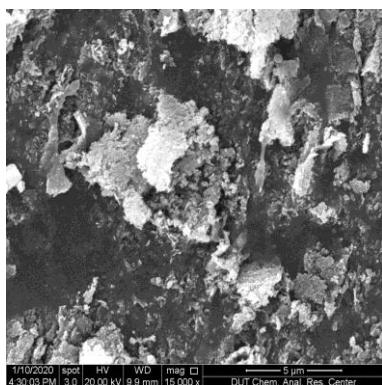

(e)

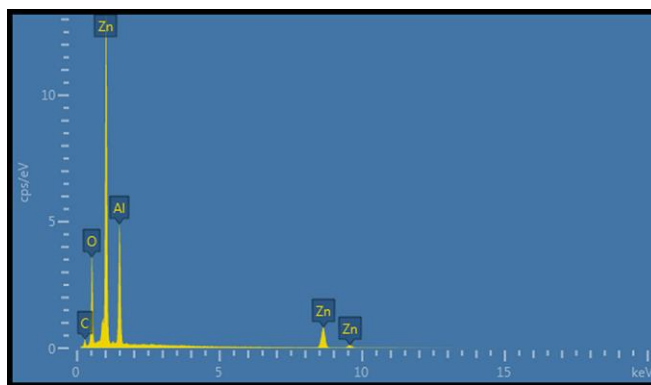

(f)

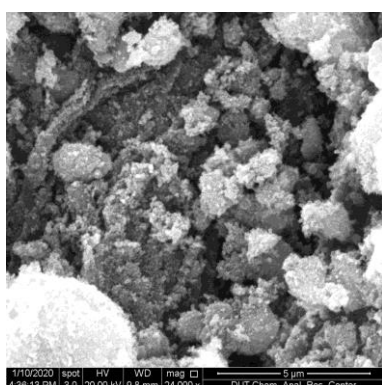

(g)

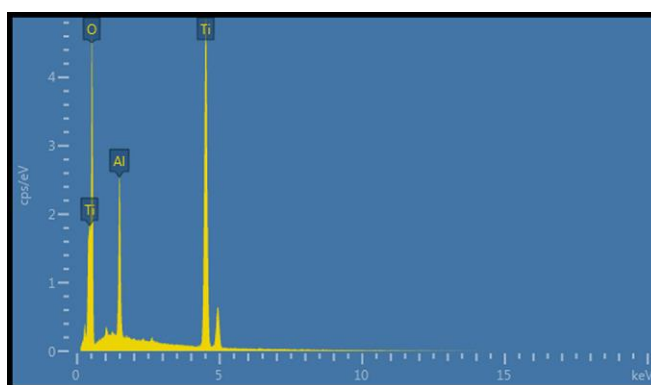

(h)

**Fig. S1. The SEM image (a) and EDS spectrum (b) of  $\text{Al}_2\text{O}_3$  nanoparticles (NPs), The SEM image (c) and EDS spectrum (d) of  $\text{Fe}_3\text{O}_4$  NPs , The SEM image (e) and EDS spectrum (f) of ZnO NPs, The SEM image (g) and EDS spectrum (h) of  $\text{TiO}_2$  NPs.**

## Part S2 Characterization of NPs: XRD patterns and average size of nanoparticles

XRD patterns was analyzed by jade 9.0 software, after calculation, the particle size of  $\text{Fe}_3\text{O}_4$  NPs is larger given 30nm, and the sizes of other nanoparticles are almost 30nm.

- (a) XRD pattern of  $\text{Al}_2\text{O}_3$  nanoparticles (NPs), the average size of  $\text{Al}_2\text{O}_3$  NPs is 34nm.
- (b) XRD pattern of  $\text{Fe}_3\text{O}_4$  NPs, the average size of  $\text{Fe}_3\text{O}_4$  NPs is 92 nm.
- (c) XRD pattern of ZnO NPs, the average size of ZnO NPs is 25 nm.
- (d) XRD pattern of  $\text{TiO}_2$  NPs, the average size of  $\text{TiO}_2$  NPs is 23 nm.

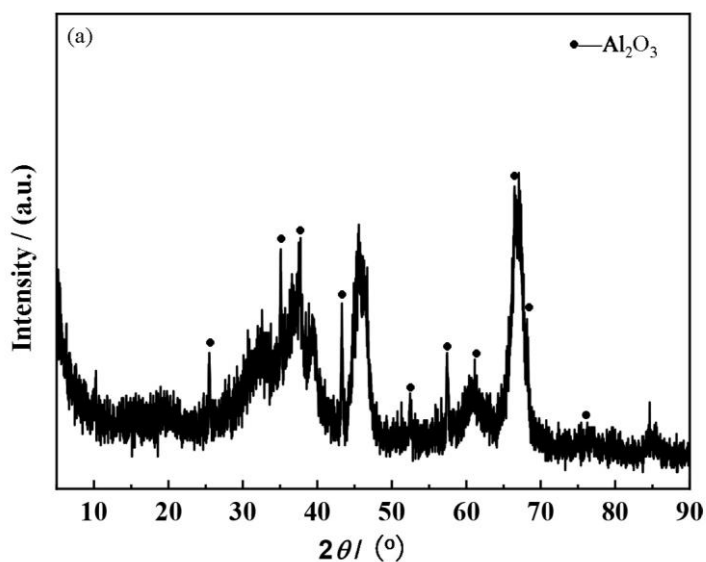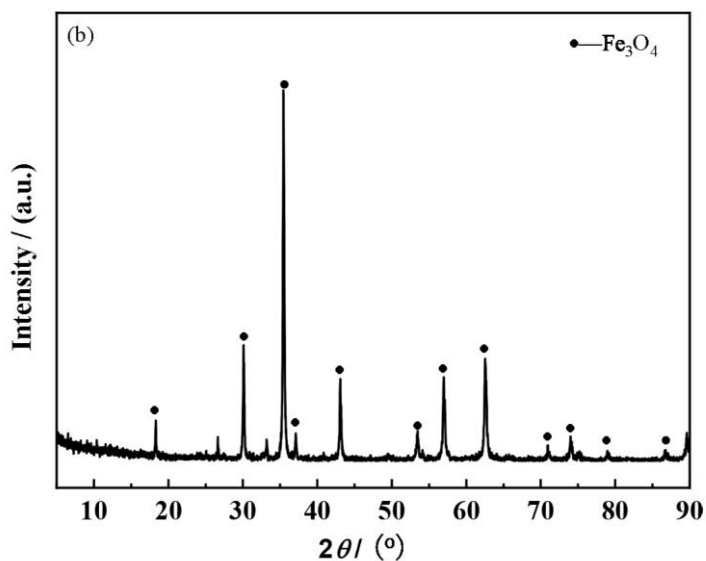

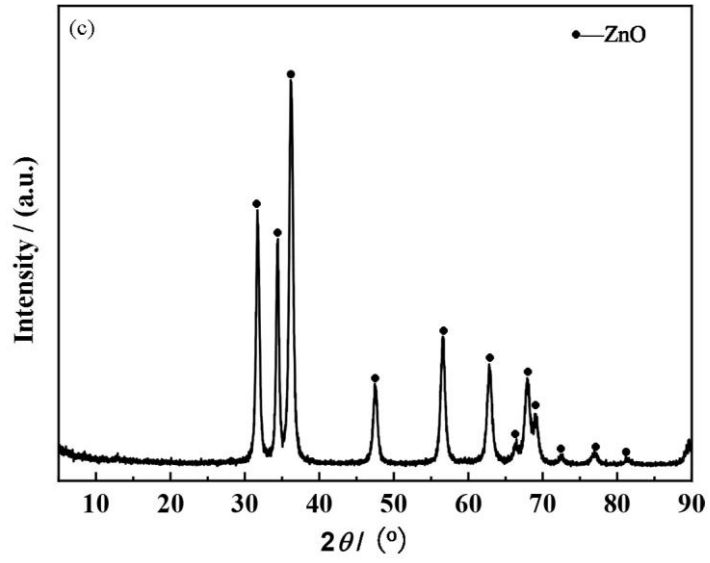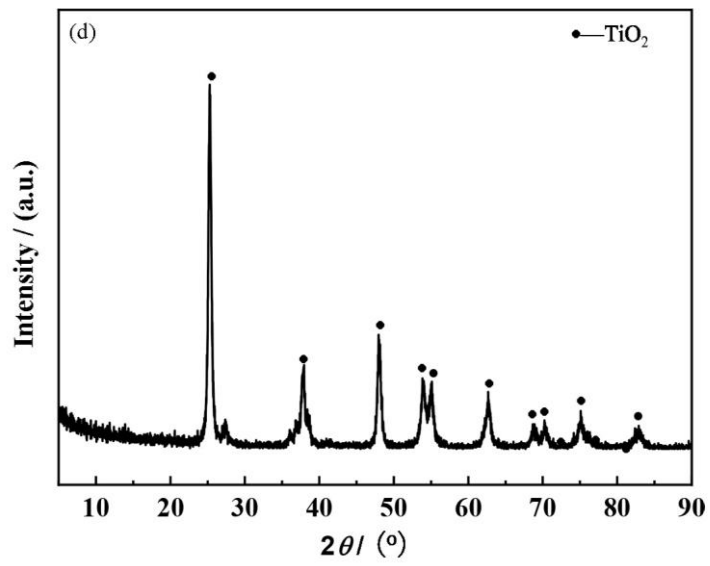

Fig. S2. XRD pattern of Al<sub>2</sub>O<sub>3</sub> nanoparticles (NPs) (a), XRD pattern of Fe<sub>3</sub>O<sub>4</sub> NPs (b), XRD pattern of ZnO NPs (c), XRD pattern of TiO<sub>2</sub> NPs (d).

### **Part S3 Curve-fitting of second derivative spectra for TB-EPS and LB-EPS**

**0-LB** Curve-fitting of second derivative spectra for LB-EPS.

**0-TB** Curve-fitting of second derivative spectra for TB-EPS.

**a-LB** When sludge is treated with 0.04g/g TSS Al<sub>2</sub>O<sub>3</sub> NPs, the Curve-fitting of second derivative spectra for LB-EPS.

**a-TB** When sludge is treated with 0.05g/g TSS Al<sub>2</sub>O<sub>3</sub> NPs, the Curve-fitting of second derivative spectra for TB-EPS.

**b-LB** When sludge is treated with 0.05g/g TSS Fe<sub>3</sub>O<sub>4</sub> NPs, the Curve-fitting of second derivative spectra for LB-EPS.

**b-TB** When sludge is treated with 0.05g/g TSS Fe<sub>3</sub>O<sub>4</sub> NPs, the Curve-fitting of second derivative spectra for TB-EPS.

**c-LB** When sludge is treated with 0.05g/g TSS ZnO NPs, the Curve-fitting of second derivative spectra for LB-EPS.

**c-TB** When sludge is treated with 0.05g/g TSS ZnO NPs, the Curve-fitting of second derivative spectra for TB-EPS.

**d-LB** When sludge is treated with 0.03g/g TSS TiO<sub>2</sub> NPs, the Curve-fitting of second derivative spectra for LB-EPS.

**d-TB** When sludge is treated with 0.03g/g TSS TiO<sub>2</sub> NPs, the Curve-fitting of second derivative spectra for TB-EPS.

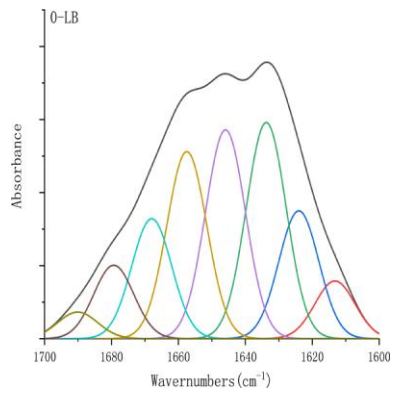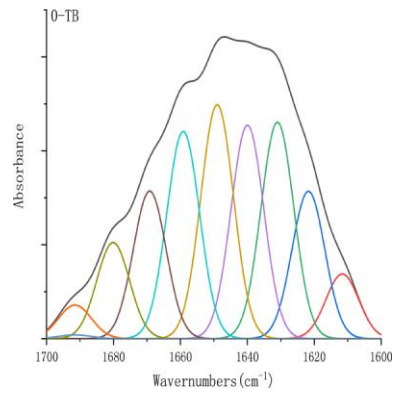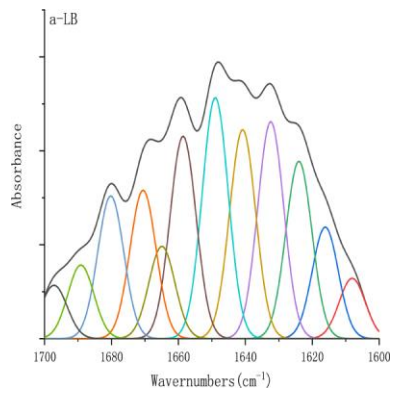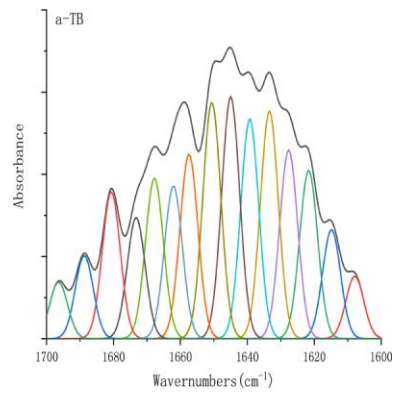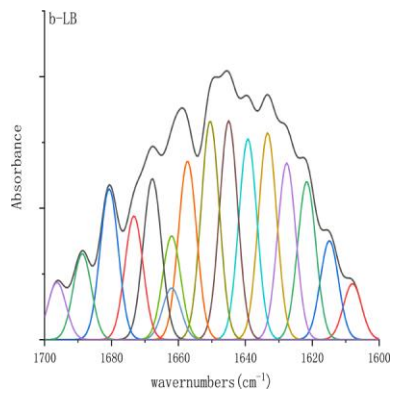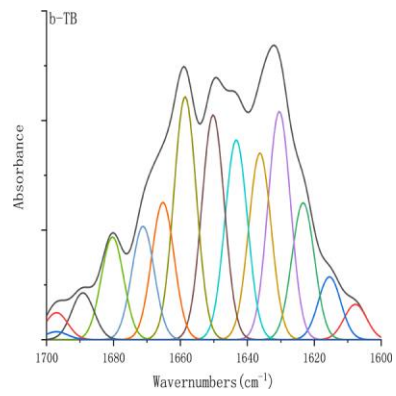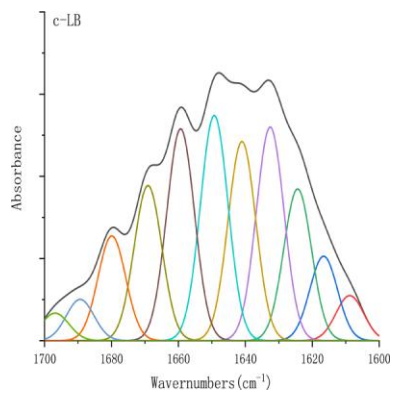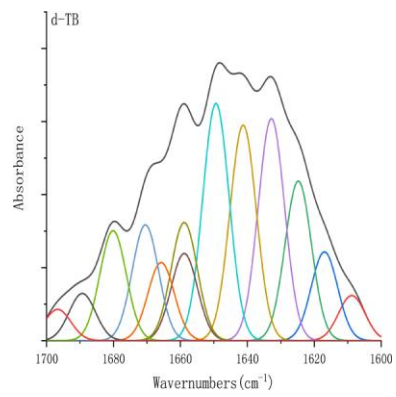

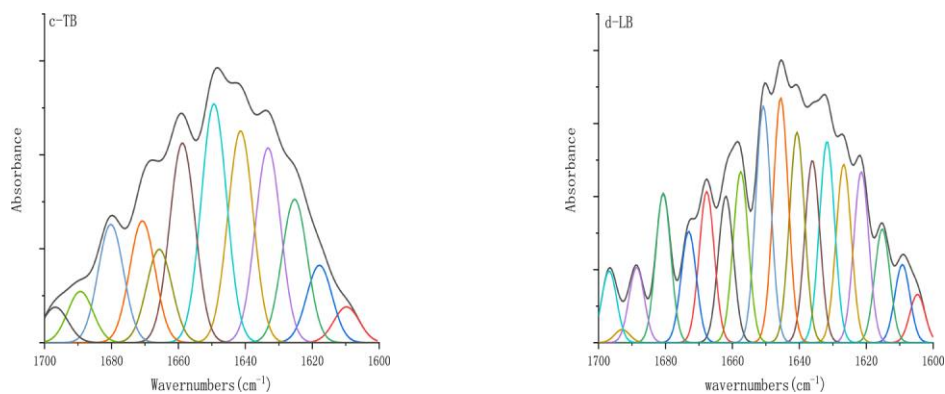

**Fig. S3. Curve-fitting of second derivative spectra for extracellular polymeric substances (EPS). Blank samples (0), Al<sub>2</sub>O<sub>3</sub> nanoparticles (NPs) treated sludge (0.04 g/g TSS) (a), Fe<sub>3</sub>O<sub>4</sub> NPs treated sludge (0.05 g/g TSS) (b), ZnO NPs treated sludge (0.05 g/g TSS) (c), TiO<sub>2</sub> NPs treated sludge (0.03 g/g TSS) (d). TSS = total suspended solid.**
